Data release note: 1

# Whole genome resequencing of a 2 laboratory-adapted *Drosophila melanogaster* 3 population sample 4

William P. Gilks<sup>1,a</sup>, Tanya M. Pennell<sup>1</sup>, Ilona Flis<sup>1</sup>, Matthew T. Webster<sup>2</sup>, Edward H. 6  
Morrow<sup>1,b</sup> 7

1. Evolution, Behaviour and Environment Group, School of Life Sciences, John 9  
Maynard Smith Building, University of Sussex, Falmer, BN1 9QG, United Kingdom, 10  
<http://www.sussex.ac.uk/lifesci/morrowlab/>, <sup>a</sup>[wpgilks@gmail.com](mailto:wpgilks@gmail.com), 11  
<sup>b</sup>[ted.morrow@sussex.ac.uk](mailto:ted.morrow@sussex.ac.uk) 12
2. Science for Life Laboratory, Department of Medical Biochemistry and 13  
Microbiology, PO Box 582, Uppsala Universitet, SE-751 23 Uppsala, Sweden. 14

## Abstract

15

As part of a study into the molecular genetics of sexually dimorphic complex traits, we used next-generation sequencing to obtain data on genomic variation in an outbred laboratory-adapted fruit fly (*Drosophila melanogaster*) population. We successfully resequenced the whole genome of 2 females from the Berkeley reference line (BDGP6/dm6), and 220 hemiclinal females that were heterozygous for the same reference line genome, and a unique haplotype from the outbred base population (LH<sub>M</sub>). The use of a static and known genetic background enabled us to obtain sequences from whole-genome phased haplotypes. We used a BWA-Picard-GATK pipeline for mapping sequence reads to the dm6 reference genome assembly, at a median depth-of coverage of 31X, and have made the resulting data publicly-available in the NCBI Short Read Archive (BioProject PRJNA282591). Haplotype Caller discovered and genotyped 1,726,931 genetic variants (SNPs and indels, <200bp). Additionally, we used GenomeStrip/2.0 to discover and genotype 167 large structural variants (1-100Kb in size). Sequence data and quality-filtered genotype data are publicly-available at NCBI (Short Read Archive, dbSNP and dbVar). We have also released the unfiltered genotype data, and the code and logs for data processing, summary statistics, and graphs, via the research data repository, Zenodo, (<https://zenodo.org/>, 'Sussex *Drosophila* Sequencing' community).

16

17

18

19

20

21

22

23

24

25

26

27

28

29

30

31

32

33

34

# 1 Introduction

35

As part of a study on the molecular genetics of sexually dimorphic complex traits, we used hemiclonal analysis in conjunction with next-generation sequencing to characterise molecular genetic variation across the genome, from an outbred laboratory-adapted population of *Drosophila melanogaster*, known as LH<sub>M</sub><sup>1,11</sup>. The hemiclone experimental design allows the repeated phenotyping of multiple individuals, each with the same unrecombined haplotype on a different random genetic background. This method has been used to investigate standing genetic variation and intersexual genetic correlations for quantitative traits<sup>1</sup> and gene expression<sup>7</sup>, but it has not yet been used to obtain genomic data.

The 220 hemiclone females that were sequenced in the present study have a maternal haplotype, from the *dm6* reference assembly strain (BDGP6+ISO1 mito/*dm6*, Bloomington *Drosophila* Stock Center no. 2057)<sup>2,6</sup>, and have a different paternal genome each, sampled using cytogenetic cloning from the LH<sub>M</sub> base population. All non-reference genotypes in the sequenced LH<sub>M</sub> hemiclones were expected to be heterozygous and in-phase, except in rare instances where the in-house *dm6* reference strain also had the same non-reference allele.

Previous studies indicate that the limits for DNA quantity in 'next-generation' sequencing are 50-500ng<sup>12</sup>. We sequenced individual *D. melanogaster*, rather than pools of clones, because more biological information can be obtained, and because modern transposon-based library preparation allows accurate sequencing at low concentrations of DNA. *D. melanogaster* is a small insect (~1μg) although this problem is off-set by the reduced proportion of repetitive intergenic sequence, and small genome size relative to other insects (170Mb verses ~500Mb),<sup>12</sup>.

We mapped reads to the *D. melanogaster* *dm6* reference assembly using a BWA-Picard-GATK pipeline, and called nucleotide variants using both HaplotypeCaller,

and Genomestrip, the latter of which detects copy-number variation up to 1Mb  
in length. We have made the mapped sequencing data, and genotype data publicly-  
available on NCBI, and additionally have made the meta-data, analysis code and logs  
publicly-available on the research data repository, Zenodo. This is the first report of a  
study which uses methods for detecting both SNPs, indels and CNVs genome-wide in  
next-generation sequencing data, and the first report of whole genome resequencing in  
hemiclonal individuals.

## 2 Materials and Methods

### 2.1 Study samples

The base population ( $LH_M$ ) was originally established from a set of 400 inseminated  
females, trapped by Larry Harshman in a citrus orchard near Escalon, California in  
1991<sup>11</sup>. It was initially kept at a large size (more than 1,800 reproducing adults) in the  
lab of William Rice (University College Santa Barbara, USA). In 1995 (approximately  
100 generations since establishment) the rearing protocol was changed to include  
non-overlapping generations, and a moderate rearing density with 16 adult pairs  
per vial (56 vials in total) during 2 days of adult competition, and 150-200 larvae  
during the larval competition stage<sup>11</sup>. In 2005, a copy of  $LH_M$  population sample  
was transferred to Uppsala University, Sweden (approximately 370 generations since  
establishment), and in 2012, to the University of Sussex (UK), when the current  
set of 223 haplotypes were sampled. At the point of sampling we estimate that the  
population had undergone 545 generations under laboratory conditions, 445 of which  
had been using the same rearing protocol.

Hemiclonal lines were established by mating groups of five clone-generator females  
( $C(1)DX,y,f; T(2;3) rdgC\ st\ in\ ri\ p^P\ bw^D$ ) with 230 individual males sampled from

the LH<sub>M</sub> base population (see<sup>1</sup>). A single male from each cross was then mated 85  
again to a group of five clone-generator females in order to amplify the number of 86  
individuals harbouring the sampled haplotype. Seven lines failed to become established 87  
at this point. The remaining 223 lines were maintained in groups of up to sixteen 88  
stock hemiclinal males in two vials that were transferred to fresh vials each week. 89  
Stock hemiclinal males were replenished every six weeks by mating with groups of 90  
clone-generator females. A stock of reference genome flies (Bloomington *Drosophila* 91  
Stock Center no. 2057) was established and maintained initially using five rounds 92  
of of sib-sib matings before expansion. 223 virgin reference genome females were 93  
then collected and mated to a single male from each of 223 hemiclinal lines. Female 94  
offspring from this cross therefore have one copy of the reference genome and one copy 95  
of the hemiclinal haplotype. Groups of these hemiclinal females were collected as 96  
virgins, placed in 99% ethanol and stored at -20°C prior to DNA extraction. 97

## 2.2 DNA extraction 98

One virgin female per hemiclinal line, was homogenised with a microtube pestle, 99  
followed by 30-minute mild-shaking incubation in proteinase K. DNA was purified using 100  
the DNeasy Blood and Tissue Kit (Qiagen, Valencia, CA), according to manufacturer's 101  
instructions. Volumes were scaled-down according to input material mass of input 102  
material. Barrier pipette tips were used throughout, in order to minimise cross- 103  
contamination of DNA. Template assessment using the Qubit BR assay (Thermo 104  
Fischer, NY, USA) indicated double-stranded DNA, 10.4Kb in length at concentrations 105  
of 2-4 ng/ $\mu$ l (total quantity 50-100ng). 106

## 2.3 Whole-genome resequencing

107

Sequencing was performed under contract by Exeter Sequencing service, University of  
Exeter, UK. The sonication protocol for shearing of the DNA was optimised for low  
concentrations to generate fragments 200-500bp in length. Libraries were prepared and  
indexed using the Nextera Library Prep Kit (Illumina, San Diego, USA). All samples  
were sequenced on a HiSeq 2500 (Illumina), with five individuals per lane. We also  
sequenced DNA from two individuals from the in-house reference line (Bloomington  
*Drosophila* Stock Centre no. 2057). One was prepared as the hemiclones, using the  
Illumina Nextera library (sample RGil), and the other using an older, Illumina Nextflex  
method (sample RGfi). The median number of read pairs across all samples was  
 $29.23 \times 10^6$  (IQR  $14.07 \times 10^6$ ). Quality metrics for the sequencing data were generated  
with FastQC v0.10.0 by Exeter Biosciences, and used to determine whether results  
were suitable for further analyses. For twelve samples with less than  $8 \times 10^6$  reads,  
sequencing was repeated successfully (H006, H041, H061, H084, H086, H087, H092,  
H098, H105), with a further three samples omitted entirely (H015, H016, H136),  
leaving 220 hemiclinal samples in total. As shown in Figures 1A and 1B, the read  
quality score and quality-per-base for the the samples taken forward for genotyping  
in this study were were well within acceptable standards, and similar across all samples.

125

## 2.4 Read mapping

126

Raw data (*fastq* files) were stored and processed in the Linux Sun Grid Engine in  
the High-Performance Computing facility, University of Sussex. Adaptor sequences  
(Illumina Nextera N501-H508 and N701-N712), poor quality reads (Phred score  $<7$ ) and  
short reads were removed using Fastq-mcf (ea-utils v.1.1.2). Settings were: log-adapter  
minimum-length-match: 2.2, occurrence threshold before adapter clipping: 0.25,

131

maximum adapter difference: 10%, minimum remaining length: 19, skew percentage- 132  
less-than causing cycle removal: 2, bad reads causing cycle removal: 20%, quality 133  
threshold causing base removal: 10, window-size for quality trimming:1, number of 134  
reads to use for sub-sampling:  $3 \times 10^5$ . 135

Cleaned sequence reads were mapped to the *D. melanogaster* genome assembly, 136  
release 6.0 (Assembly Accession GCA\_000001215.4<sup>6</sup>) using Burrows-Wheeler Aligner 137  
*mem* (version 0.7.7-r441)<sup>9</sup>, with a mapping quality score threshold of 20. Fine mapping 138  
was performed with both Stampy v1.0.24<sup>10</sup> and the Genome Analysis Tool-Kit (GATK) 139  
v3.2.2<sup>4</sup> (following<sup>8</sup>). Removal of duplicate reads, indexing and sorting was performed 140  
with Picard-Tools v1.77 and SamTools v1.0. The median depth of coverage across all 141  
samples used for genotyping was 31X (IQR 14, see Figure 1C). As shown in Figure 142  
1D, the mean nucleotide mis-match rate to the dm6 reference assembly for the LH<sub>M</sub> 143  
hemiclones was  $3.27 \times 10^{-3}$  per PCR cycle (IQR  $0.2 \times 10^{-3}$ ), contrasting with the two 144  
reference line samples for which the mis-match rate was  $0.89 - 1.10 \times 10^{-3}$  per cycle. 145  
We observed spikes of nucleotide mis-matches in some PCR cycles for some samples, 146  
which are likely to be errors rather than true sequence variation. 147

## 2.5 Small-variant detection methods 148

Single-nucleotide polymorphisms (SNPs) and insertion/deletions (indels)  $\geq 200$ bp in 149  
length, were detected and genotyped relative to the BDGP+ISO1/dm6 assembly, on 150  
chromosomes 2,3,4,X, and mitochondrial genome using Haplotype Caller (GATK 151  
v3.4-0)<sup>15</sup>. Individual bam files were genotyped, omitting reads with a mapping quality 152  
under 20, stand call and emit confidence thresholds of 31, then combined and genotyped 153  
again. 143,726,002 bases of genomic sequence were analysed from which 1,996,556 154  
variant loci were identified consisting of 1,581,341 SNPs, 196,582 deletions, and 218,633 155  
insertions. Functional annotation was added using SNPeff<sup>3</sup>. 156

We used hard-filtering to remove variants generated by error, because the alternative  
'variant recalibration' requires prior information on variant positions from a similar  
population or parents. Quality filtering thresholds were decided following inspection  
of the various sequencing metrics associated with each variant locus, and by software  
developers' recommendations<sup>15</sup>. The filtering thresholds were: Quality-by-depth  $>2$ ,  
strand bias ( $-\log_{10} p_{\text{Fisher}}$ )  $<50$ , mapping quality  $>58$ , mapping quality rank sum  $>-7.0$ ,  
read position rank sum  $>-5.0$ , combined read depth  $<15000$ , and call rate  $>90\%$ .  
This filtering removed 167,319 variants (8.3%), leaving 1,829,237. Summary values  
for the variant quality metrics are shown in Table 1. Distributions of quality metrics  
for Haplotype Caller variants are shown in Supplementary Figure 2. The density of  
sequence variants, measured as the median for windows of 10Kb in length across the  
genome, was 75 per for biallelic SNPs, 1 for multi-allelic SNPs, 6 for biallelic indels, and  
3 for multi-allelic indels (see Figure 2A). Mean separation between variants of any type  
or allele frequency was 78bp. As shown in Figure 2B the allele frequency distribution  
for biallelic SNPs and indels was similar, and broadly within expectations for an  
out-bred diploid population sample. The two in-house reference line individuals had  
515 homozygous and 3171 heterozygous mutations from the reference assembly. The  
median genotype counts for the 220 LH<sub>M</sub> hemiclone individuals, were 585 homozygous,  
728,214 heterozygous and 4963 no-call (IQR 400, 36707 and 7876). Genotype counts  
for each individual are shown in Figure 2C.

For data submission to dbSNP, we removed 44,644 indels that were multi-allelic or  
greater than 50bp in length, and a further 57,662 variants that had null alternate alleles  
(likely due to being situated within a deletion). The genotype data submitted to dbSNP  
consists of 1,726,931 quality-filtered, functionally-annotated variant records (1,423,039  
SNPs and 303,892 short, biallelic insertion and deletion variants) corresponding to  
383,378,682 individual genotype calls.



## 2.6 Structural-variant detection methods

183

Large genomic variants – deletions and duplications, between 1Kb and 100Kb in  
length – were detected and genotyped using GenomeStrip v2.0<sup>5</sup>. One of the reference  
strain individuals (sample RGfi) was omitted from the this analysis because a different  
sequencing library preparation method was used to the other samples (see above). We  
included the following settings (according to developers' guidelines): Sex-chromosome  
and k-mer masking when estimating sequencing depth, computation of GC-profiles  
and read counts, and reduced insert size distributions. Large variant discovery  
and genotyping was performed only on chromosomes 2, 3, 4 and X, omitting the  
mitochondrial genome and unmapped scaffolds.

We used the Genomestrip CNV Discovery pipeline with the settings: minimum  
refined length 500, tiling window size 1000, tiling window overlap 500, maximum  
reference gap length 1000, boundary precision 100, and genotyped the results with the  
GenerateHaploidGenotypes R script (genotype likelihood threshold 0.001). Following  
visualisation of the genotype results and comparison with the *bam* sequence alignment  
files using the Integrated Genomics Viewer (IGV)<sup>13</sup>, we excluded telomeric and  
centromeric regions where the sequencing coverage was fragmented, and six regions of  
multi-allelic gains of copy-number with dispersed break-points, previously reported  
to undergo mosaic *in vivo* amplification prior to oviposition<sup>14</sup> (see Supplementary  
Table 1 for genomic positions, and Supplementary Figure 3 for visualisation of *in vivo*  
amplification in a sequence alignment file). We excluded 6 samples (H082, H083, H090,  
H097, H098, H153) for which 80-90% of the genome was reported by Genomestrip to  
contain structural variation, which we regarded as error. Most these samples were  
grouped by the order in which they processed for DNA extraction and sequencing,  
so this may have been caused partly by a batch-effect leading to differences in read  
pair separation, depth-of-coverage, and response to normal fluctuations GC-content.

Following removal of these samples, there were 2897 CNVs (1687 deletions, 877 209  
duplications, and 333 of the 'mixed' type), ranging in size from 1000bp to 217,707bp. 210  
We observed eight regions, for which Genomestrip identified multiple adjacent CNVs 211  
in single individuals, but which are likely single CNVs, 100Kb to 1.3Mb in length 212  
(Supplementary Table 2). 213

Using a combination of assumptions based on our breeding design, visualisation of 214  
read 'pile-ups' across possible CNV regions using IGV, and inspection of quality metric 215  
distributions we used the following criteria for quality filtering: Quality score  $>15$ , 216  
Cluster separation  $<17$ , GC-fraction  $>0.33$ , no mixed types (deletions and duplications 217  
only), homozygous non-reference genotype count  $>0$ , heterozygous genotype count 218  
 $<200$ . Summaries of the quality metrics for quality-filtered data are shown in Table 2, 219  
and Supplementary Figure 2. We applied an upper limit to the cluster separation to 220  
remove groups of outliers in the upper end of the distribution, although this may have 221  
excluded many true, low-frequency variants. However, data on rare variants are not 222  
directly useful for our further investigations. 223

After filtering, 167 CNVs remained (78 deletions and 89 duplications, size range 224  
1Kb-26.6Kb). The positions and genotypes of these CNVs for each individual are 225  
shown in Figure 3. The genotype data for quality-filtered CNVs were combined with 226  
the data from 2252 indels  $>50$ bp from the Haplotype Caller pipeline, and a total of 227  
2419 variants were uploaded to the public database on structural variation, NCBI 228  
dbVar. Although we have used methods for detecting SNPs, indels and CNVs, variants 229  
between 200bp and 1Kb are not reported by either HaplotypeCaller or Genomestrip. 230  
Additionally, sequence inversions are not detected by these methods, and the upper 231  
limits to CNV detection using Genomestrip, based on the parameters and results of 232  
this study are 100Kb-1Mb. 233

### 3 Dataset Validation

234

Initial validation of our methods can be seen by lack of variants in the two reference  
line individuals compared with the LH<sub>M</sub> hemiclones (3,686 verses a median of 728,799  
per sample). For a more thorough test the reproducibility of the genotyping and  
hemiclone method, we sequenced an additional hemiclone individual from three of  
the LH<sub>M</sub> lines, and mapped the reads to the reference genome assembly as before.  
For HaplotypeCaller, we generated 'g.vcf' files for each sample, and then performed  
genotyping and quality-filtering as described above, except that the original three  
samples were replaced with the replication test samples. Similarly, for Genomestrip,  
we performed structural variant discovery and genotyping all of the same samples  
as before, replacing three original samples with the replication test samples. We  
then used the GATK Genotype Concordance function to generate counts of genotype  
differences between the three pairs of samples. Overall results are presented in Table  
3. Genotype reproducibility for quality-filtered bi-allelic SNPs was 98.5-99.5%, going  
down to 89.1-93.2% for filtered multi-allelic indels. Reproducibility of structural variant  
genotype calls was 95.6-100.0%, although we noted that for one individual (H119)  
filtering actually reduced the reproducibility rate from 99.7% to 95.6%. Full code,  
logs and numerical results can be found at <http://doi.org/10.5281/zenodo.160539>.

Although these results indicate that our genotype accuracy is very good, there  
are several caveats to consider. In the quality-filtered small-variant data, seven  
samples (H034, H035, H040, H038, H039, H188, H174) had prominently higher  
genotype drop-out rates than the others (of 2-7%), as well as a higher proportion of  
homozygous non-reference genotypes (2-4%; See Figure 2C). Additionally two samples  
had prominently more heterozygous variants (H072:885,551 and H093:955,148 verses  
the other LH<sub>M</sub> hemiclones: mean 710,934).

Although the genotype replication rate for the structural variants was also very

high, we cannot exclude the possibility that, due to incomplete masking of hard-to- 260  
sequence regions of the reference assembly, variants which are artefacts reported in 261  
the original genotype data, may also be present in the replication genotype data. 262

## 4 Data Availability 263

All publicly-available records are for 220 LH<sub>M</sub> hemiclone individuals and 2 in-house 264  
reference line individuals, with the exception of the large-variant data for which one 265  
in-house reference line sample and six LH<sub>M</sub> hemiclones were omitted. The NCBI Bio- 266  
Project identifier is PRJNA282591. Code, logs and quality control data for each dataset, 267  
and for generating the figures and tables in this manuscript are publicly-available at the 268  
research data repository, Zenodo, <https://zenodo.org/>, 'Sussex Drosophila Sequencing' 269  
community. Use of the files uploaded to Zenodo is under Creative Commons 4.0 license. 270

271

### 4.1 Data record 1: Sequencing data 272

Raw *fastq* sequence reads, and *bam* alignment files for the *D. melanogaster* are publicly- 273  
available at the NCBI Sequence Read Archive, accession number SRP058502. The 274  
code for read-mapping, alongside the run logs and quality-control data are available 275  
at <https://doi.org/10.5281/zenodo.159251>. Additionally the sequence alignment files 276  
for the corresponding *Wolbachia* have accession number SRP091004, with further 277  
supporting files at <https://doi.org/10.5281/zenodo.159784>. 278

### 4.2 Data record 2: Small-variant data 279

Records of quality-filtered sequence variants identified by GATK HaplotypeCaller 280  
in the LH<sub>M</sub> hemiclones, and in the in-house reference line, have been submitted to 281

NCBI dbSNP, [https://www.ncbi.nlm.nih.gov/projects/SNP/snp\\_viewBatch.cgi?sbid=](https://www.ncbi.nlm.nih.gov/projects/SNP/snp_viewBatch.cgi?sbid=) 282  
1062461, handle: MORROW\_EBE\_SUSSEX. In compliance with NCBI dbSNP criteria, 283  
variants >50bp in length, multi-allelic indels, and variants with a null alternate allele 284  
have been omitted. Genotype data, pre- and post-filtering, are also available at 285  
<https://doi.org/10.5281/zenodo.159272>, alongside the analysis code, run logs and 286  
quality-control data summaries. 287

### 4.3 Data record 3: Structural-variant data 288

Records of quality-filtered variants detected by GenomeStrip, and variants >50bp 289  
detected by Haplotype Caller are publicly-available at NCBI dbVar, accession number 290  
nstd134, <http://www.ncbi.nlm.nih.gov/dbVar/nstd134>. Unfiltered and filtered geno- 291  
type data, code for CNV discovery and genotyping using Genomestrip/2.0, run logs, 292  
and summary data are publicly-available at <https://doi.org/10.5281/zenodo.159472>. 293

### Author contributions 294

EM conceived and supervised the experiment. EM, TP, IF, MW and WG designed 295  
the experiment. TP and IF established and maintained the lines, and carried out the 296  
DNA extractions. WG analysed the sequencing and genotype data. WG and MW 297  
developed the read-mapping and variant-calling procedures. WG and EM wrote the 298  
manuscript. 299

### Competing interests 300

The authors declare no competing interests. 301

## Grant information 302

Funding was provided to EM by a Royal Society University Research Fellowship, the 303  
Swedish Research Council (No. 2011-3701), and the European Research Council (No. 304  
280632). 305

306

## Acknowledgements 307

Sequencing was performed under contract by Exeter University, DNA Sequencing 308  
Service (UK), who also provided analysis advice, [http://www.exeter.ac.uk/business/](http://www.exeter.ac.uk/business/facilities/sequencing/) 309  
[facilities/sequencing/](http://www.exeter.ac.uk/business/facilities/sequencing/). Crucial computational support was provided by Jeremy Maris 310  
at the Centre for High-Performance Computing, University of Sussex, [http://www.](http://www.sussex.ac.uk/its/services/research/highperformance) 311  
[sussex.ac.uk/its/services/research/highperformance](http://www.sussex.ac.uk/its/services/research/highperformance). Bob Handsaker (Harvard Medical 312  
School, USA) provided analysis advice for use of Genomestrip for structural variant 313  
detection. 314

## References 315

- [1] Jessica K. Abbott and Edward H. Morrow. “Obtaining snapshots of genetic 316  
variation using hemiclinal analysis”. eng. In: *Trends in Ecology & Evolution* 317  
26.7 (July 2011), pp. 359–368. ISSN: 1872-8383. DOI: 10.1016/j.tree.2011.03.011. 318
- [2] M. D. Adams et al. “The genome sequence of *Drosophila melanogaster*”. eng. In: 319  
*Science (New York, N. Y.)* 287.5461 (Mar. 2000), pp. 2185–2195. ISSN: 0036-8075. 320
- [3] Pablo Cingolani et al. “A program for annotating and predicting the effects of 321  
single nucleotide polymorphisms, SnpEff: SNPs in the genome of *Drosophila* 322  
*melanogaster* strain w1118; iso-2; iso-3”. eng. In: *Fly* 6.2 (June 2012), pp. 80–92. 323  
ISSN: 1933-6942. DOI: 10.4161/fly.19695. 324

- 
- [4] Mark A. DePristo et al. “A framework for variation discovery and genotyping using next-generation DNA sequencing data”. eng. In: *Nature Genetics* 43.5 (May 2011), pp. 491–498. ISSN: 1546-1718. DOI: 10.1038/ng.806.
- [5] Robert E. Handsaker et al. “Large multiallelic copy number variations in humans”. eng. In: *Nature Genetics* 47.3 (Mar. 2015), pp. 296–303. ISSN: 1546-1718. DOI: 10.1038/ng.3200.
- [6] Roger A. Hoskins et al. “The Release 6 reference sequence of the *Drosophila melanogaster* genome”. eng. In: *Genome Research* 25.3 (Mar. 2015), pp. 445–458. ISSN: 1549-5469. DOI: 10.1101/gr.185579.114.
- [7] Paolo Innocenti and Edward H. Morrow. “The Sexually Antagonistic Genes of *Drosophila melanogaster*”. en. In: *PLoS Biology* 8.3 (Mar. 2010). Ed. by Laurence D. Hurst, e1000335. ISSN: 1545-7885. DOI: 10.1371/journal.pbio.1000335. URL: <http://dx.plos.org/10.1371/journal.pbio.1000335>.
- [8] Justin B. Lack et al. “The *Drosophila* genome nexus: a population genomic resource of 623 *Drosophila melanogaster* genomes, including 197 from a single ancestral range population”. eng. In: *Genetics* 199.4 (Apr. 2015), pp. 1229–1241. ISSN: 1943-2631. DOI: 10.1534/genetics.115.174664.
- [9] Heng Li et al. “The Sequence Alignment/Map format and SAMtools”. eng. In: *Bioinformatics (Oxford, England)* 25.16 (Aug. 2009), pp. 2078–2079. ISSN: 1367-4811. DOI: 10.1093/bioinformatics/btp352.
- [10] Gerton Lunter and Martin Goodson. “Stampy: A statistical algorithm for sensitive and fast mapping of Illumina sequence reads”. en. In: *Genome Research* 21.6 (June 2011), pp. 936–939. ISSN: 1088-9051, 1549-5469. DOI: 10.1101/gr.111120.110. URL: <http://genome.cshlp.org/content/21/6/936>.

- [11] William R. Rice et al. “Inter-locus antagonistic coevolution as an engine of  
speciation: assessment with hemiclinal analysis”. eng. In: *Proceedings of the  
National Academy of Sciences of the United States of America* 102 Suppl 1 (May  
2005), pp. 6527–6534. ISSN: 0027-8424. DOI: 10.1073/pnas.0501889102.
- [12] Stephen Richards and Shwetha C Murali. “Best practices in insect genome  
sequencing: what works and what doesn’t”. en. In: *Current Opinion in Insect  
Science* 7 (Feb. 2015), pp. 1–7. ISSN: 22145745. DOI: 10.1016/j.cois.2015.02.013.  
URL: <http://linkinghub.elsevier.com/retrieve/pii/S2214574515000310>.
- [13] James T Robinson et al. “Integrative genomics viewer”. In: *Nature Biotechnology*  
29.1 (Jan. 2011), pp. 24–26. ISSN: 1087-0156, 1546-1696. DOI: 10.1038/nbt.1754.  
URL: <http://www.nature.com/doifinder/10.1038/nbt.1754>.
- [14] A. C. Spradling and A. P. Mahowald. “Amplification of genes for chorion  
proteins during oogenesis in *Drosophila melanogaster*”. eng. In: *Proceedings of  
the National Academy of Sciences of the United States of America* 77.2 (Feb.  
1980), pp. 1096–1100. ISSN: 0027-8424.
- [15] Geraldine A. Van der Auwera et al. “From FastQ data to high confidence  
variant calls: the Genome Analysis Toolkit best practices pipeline”. ENG. In:  
*Current Protocols in Bioinformatics / Editorial Board, Andreas D. Baxevanis  
... [et Al.]* 11.1110 (Oct. 2013), pp. 11.10.1–11.10.33. ISSN: 1934-340X. DOI:  
10.1002/0471250953.bi1110s43.



## 5 Tables

369

**Table 1.** Haplotype Caller variant quality metrics and genotype frequencies.

| Variant type        | SNPs (biallelic) | SNPs (multi)  | Indels (biallelic) | Indels (multi) |
|---------------------|------------------|---------------|--------------------|----------------|
| N                   | 1,411,395        | 43,798        | 138,687            | 65,660         |
| Total depth         | 6440 (1725)      | 6316 (2100)   | 6134 (1836)        | 5973 (2081)    |
| Event length        | 0 (0)            | 0 (0)         | 2 (5)              | 1 (8)          |
| Strand bias         | 1.12 (2.25)      | 1.34 (3.14)   | 1.76 (3.88)        | 1.77 (4.45)    |
| Mapping quality     | 62.12 (6.18)     | 64.94 (8.57)  | 71.17 (12.77)      | 69.58 (11.36)  |
| Map qual rank sum   | 0.25 (1.04)      | 0.9 (2.37)    | 3.14 (3.21)        | 2.68 (2.91)    |
| Quality-by-depth    | 16.65 (3.51)     | 17(3.81)      | 18.52 (6.21)       | 16.96 (6.39)   |
| Quality             | 34968 (62236)    | 57028 (67558) | 25842 (59889)      | 40479 (63590)  |
| Genotype counts     |                  |               |                    |                |
| Reference           | 151 (120)        | 102(122)      | 166(114)           | 122(123)       |
| Heterozygous        | 70 (118)         | 117(121)      | 54(114)            | 95(122)        |
| Homozygous non-ref. | 0 (0)            | 0(0)          | 0(0)               | 0(0)           |
| No call             | 0 (1)            | 1(4)          | 0(2)               | 2(5)           |

Values show the total number of variants, median (and IQR) for each metric. Data generated from *vcf* file using GATK VariantsToTable, on the quality-filtered data. Code and data used to generate this table located at <https://doi.org/10.5281/zenodo.159282>.

**Table 2.** Quality metrics for Genomestrip CNVs

| metric                        | Deletions       | Duplications     |
|-------------------------------|-----------------|------------------|
| N                             | 78              | 89               |
| GC-fraction                   | 0.39 (0.07)     | 0.42 (0.06)      |
| Cluster separation            | 8.84 (3.70)     | 9.78 (3.17)      |
| Quality                       | 103.93 (505.71) | 490.95 (1128.32) |
| Heterozygote count (max 213)* | 22.00 (42.50)   | 42.00 (53.00)    |
| Length (kb)                   | 2.20 (3.54)     | 3.40 (2.35)      |

Values show the total number of variants, median (and IQR) for each metric. Data generated from *vcf* file using GATK VariantsToTable, on the quality-filtered data. \*No CNVs in the quality-filtered samples had a 'no-call' or homozygous non-reference genotype.

**Table 3.** Genotype reproducibility rates(%)\*.

| Variant type               | Sample ID | Unfiltered | Filtered |
|----------------------------|-----------|------------|----------|
| <i>HaplotypeCaller/3.4</i> |           |            |          |
| Bi-allelic SNP             | H119      | 98.9       | 99.5     |
|                            | H137      | 97.7       | 98.5     |
|                            | H151      | 97.8       | 98.3     |
| Multi-allelic SNP          | H119      | 95.0       | 96.6     |
|                            | H137      | 92.3       | 94.0     |
|                            | H151      | 92.1       | 93.6     |
| Bi-allelic indel           | H119      | 98.1       | 98.6     |
|                            | H137      | 96.3       | 96.8     |
|                            | H151      | 96.0       | 96.4     |
| Multi-allelic indel        | H119      | 91.9       | 93.2     |
|                            | H137      | 88.0       | 89.3     |
|                            | H151      | 87.9       | 89.1     |
| <i>Genomestrip/2.0</i>     |           |            |          |
| Deletion                   | H119      | 99.7       | 95.6     |
|                            | H137      | 100.0      | 100.0    |
|                            | H151      | 100.0      | 100.0    |
| Duplication                | H119      | 99.7       | 100.0    |
|                            | H137      | 99.9       | 100.0    |
|                            | H151      | 99.6       | 100.0    |

\*Presented values are the overall genotype concordance, as generated using GATK/3.4 Genotype Concordance function. Code, logs and output data are available at <http://doi.org/10.5281/zenodo.160539>.

## 6 Figures

370

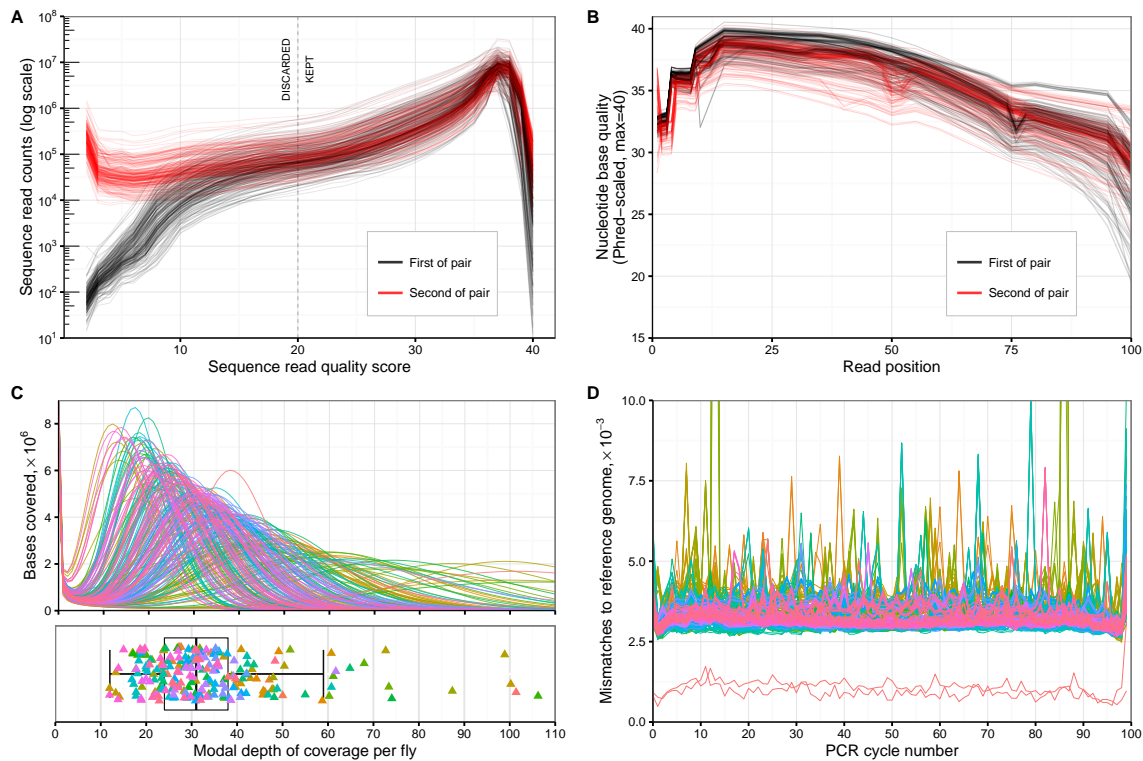

**Figure 1. Next-generation sequencing assessment.** A: Sequence read quality for each sample sequenced. Y-axis scale is logarithmic. B: Quality of sequences by nucleotide base position for each sample. C: Read depth of coverage distribution across each sample. Colouring corresponds to the order which which the samples were originally sequenced. D: Mis-matches to the dm6 reference genome assembly, by PCR cycle-number. Colouring is by sample as in plot C. The two red lines with visibly-lower mismatch rates than the others correspond to the two in-house BDGP/dm6 reference lines that were sequenced. Data and code for this figure is located at <https://doi.org/10.5281/zenodo.159282>.

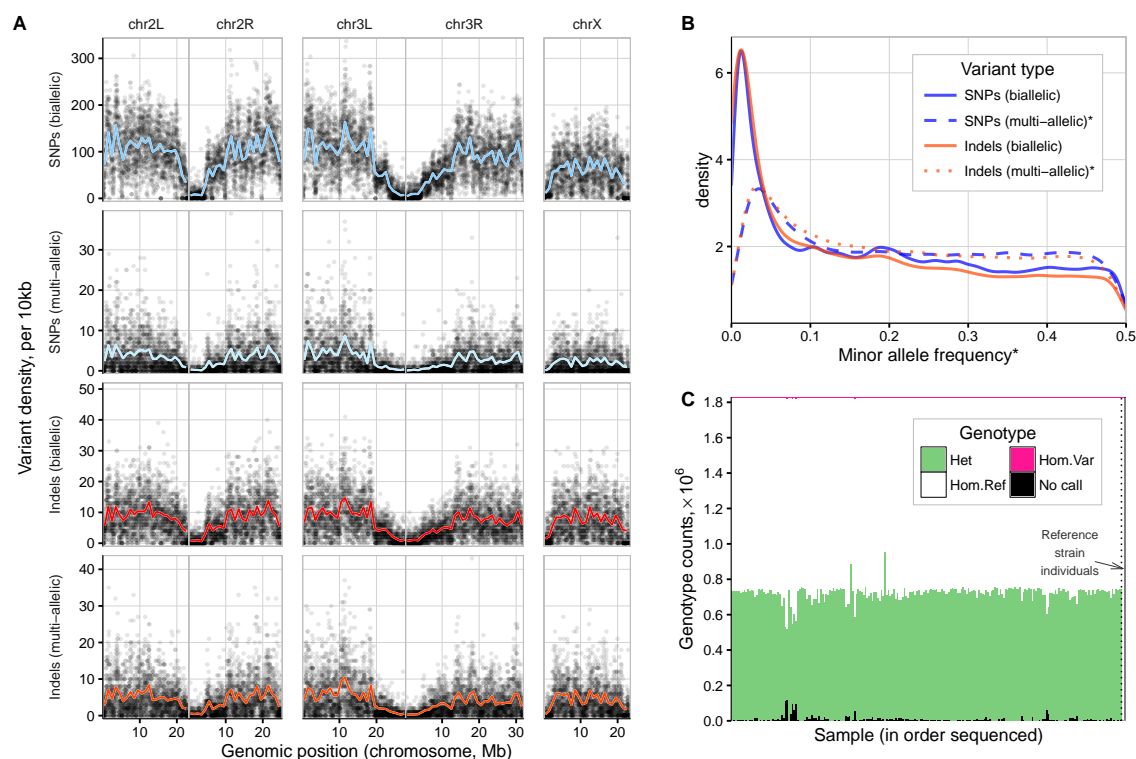

**Figure 2. Summary of SNPs and indels in the LHM sample.** A: Density of common variants across the genome (MAF>0.05 (Variants from the in-house reference line are included but account for less than 3,686 of the 1,825,917 common variants plotted (<0.2%). B: Allele frequency distribution by variant type. \*MAF values were calculated from the count of heterozygous calls, and so for multi-allelic variants, the MAF is derived from the combined count of both alternate alleles. C: Genotype counts per individual genotyped. Data generated using GATK/3.4 VariantEvaluation function. Data and code for this figure is located at <https://doi.org/10.5281/zenodo.159282>.

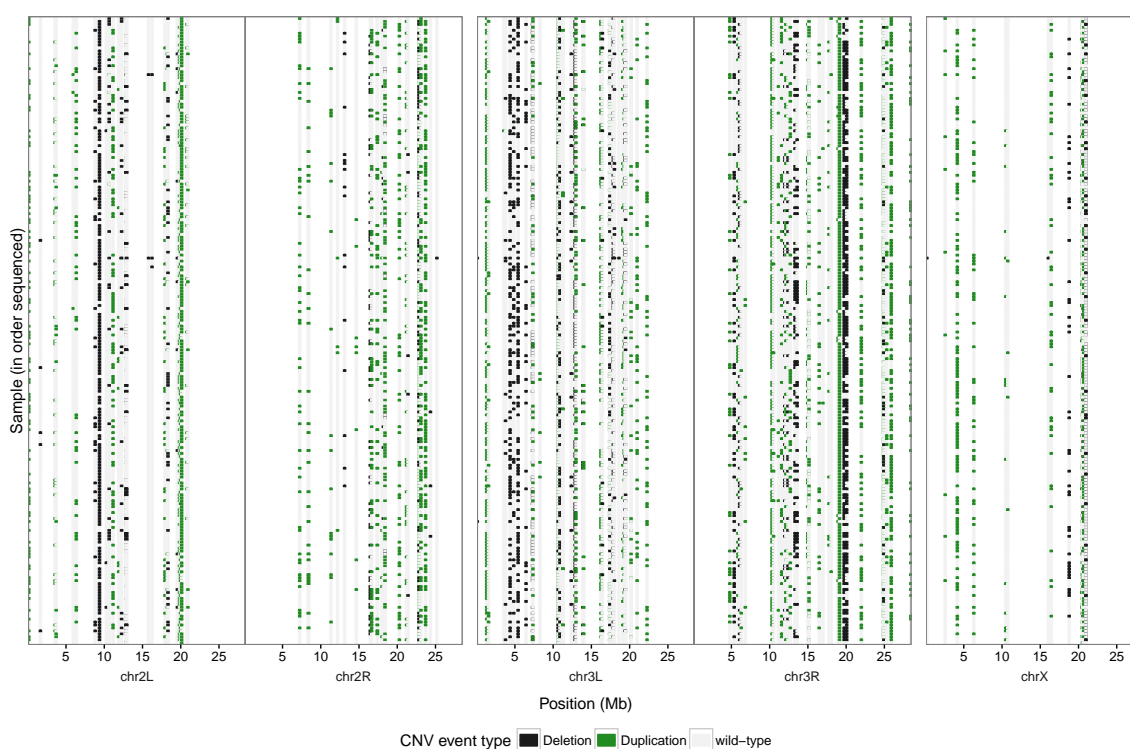

**Figure 3. Structural variants across the *D. melanogaster* genome for the LHM population sample.** Each row corresponds to an individual sequenced (in order originally sequenced from top to bottom, with the reference line at the bottom). Image generated using R/ggplot2 with data generated by GATK VariantsToTable with individual genotypes as copy-numbers. Data and code for this figure is located at <https://doi.org/10.5281/zenodo.159282>.

## 7 Supplementary information 371

### 7.1 URLs for External data and Software 372

dm6 Reference assembly (GCA\_000001215.4) <ftp://hgdownload.cse.ucsc.edu/goldenPath/dm6/> 373

dm6/ 374

FastQC 0.10.0 <http://www.bioinformatics.babraham.ac.uk/> 375

EA-Utills (cleaning of sequence reads) 1.1.2 <https://code.google.com/p/ea-utils/> 376

Burrows-Wheeler Aligner (BWA) 0.7.7-r441 <http://bio-bwa.sourceforge.net/> 377

Stampy 1.0.24 <http://www.well.ox.ac.uk/project-stampy> 378

Genome Analysis Tool-Kit (GATK) 3.2.2, and later 3.4-0, as specified in the code and main manuscript text. <https://www.broadinstitute.org/gatk/> 379

PicardTools 1.77 <http://picard.sourceforge.net> 381

SamTools 1.0 <http://samtools.sourceforge.net/> 382

GenomeStrip 2.0 <http://www.broadinstitute.org/software/genomestrip/> 383

Script for generating genotype calls from GenomeStrip/2.0 CNV likelihood scores. 384

More recent versions of Genomestrip include this script. [ftp://ftp.broadinstitute.org/pub/svtoolkit/misc/cnvs/estimate\\_cnv\\_allele\\_frequencies.R](ftp://ftp.broadinstitute.org/pub/svtoolkit/misc/cnvs/estimate_cnv_allele_frequencies.R) 385

386

387

## 7.2 Supplementary Tables

388

**Table S1.** Regions from which structural variants reported by Genomestrip/2.0 were excluded.

| Chromosome | Start position | Stop position | Feature                      |
|------------|----------------|---------------|------------------------------|
| 2L         | 0              | 20,000        | telomere                     |
| 2L         | 9,450,000      | 9,600,000     | <i>In vivo</i> amplification |
| 2L         | 13,300,000     | 13,500,000    | <i>In vivo</i> amplification |
| 2L         | 21,000,000     | 23,513,712    | centromere                   |
| 2R         | 0              | 6,000,000     | centromere                   |
| 2R         | 25,256,600     | 25,286,936    | telomere                     |
| 3L         | 0              | 70,000        | telomere                     |
| 3L         | 2,250,000      | 2,320,000     | <i>In vivo</i> amplification |
| 3L         | 8,500,000      | 8,800,000     | <i>In vivo</i> amplification |
| 3L         | 22,500,000     | 28,110,227    | centromere                   |
| 3R         | 0              | 4,500,000     | centromere                   |
| 3R         | 32,000,000     | 32,079,331    | telomere                     |
| X          | 3,650,000      | 3,800,000     | <i>In vivo</i> amplification |
| X          | 8,400,000      | 8,520,000     | <i>In vivo</i> amplification |
| X          | 21,000,000     | 23,542,271    | centromere                   |

Genomic positions for centromeric and telomeric regions were determined following visualisation of *bam* sequence alignment files, where the sequencing coverage was fragmented, causing read pairs to be excessively separated without evidence of structural variation.

**Table S2.** Structural variants called as multiple events by Genomestrip

| Type        | Chromosome | Start position* | Stop position* | Length(bp) | Sample present in |
|-------------|------------|-----------------|----------------|------------|-------------------|
| Duplication | 2L         | 4,894,940       | 5,861,033      | 966,093    | H037              |
| Deletion    | 2L         | 15,335,536      | 16,655,783     | 1,320,247  | H023              |
| Deletion    | 2R         | 16,188,011      | 16,306,112     | 118,101    | H029              |
| Duplication | 2R         | 21,499,905      | 22,386,557     | 886,652    | H165              |
| Deletion    | 3R         | 8,096,329       | 8,363,019      | 266,690    | H111              |
| Duplication | 3R         | 15,720,028      | 17,043,150     | 1,323,122  | H148              |
| Duplication | 3R         | 23,162,039      | 23,585,335     | 423,296    | H050              |
| Duplication | X          | 19,995,505      | 20,112,715     | 117,210    | H203              |

\*Start and stop positions were determined from the limits of individual events identified by Genomestrip. Positions are relative to the *D.melanogaster* reference assembly dm6.

## 7.3 Supplementary Figures

389

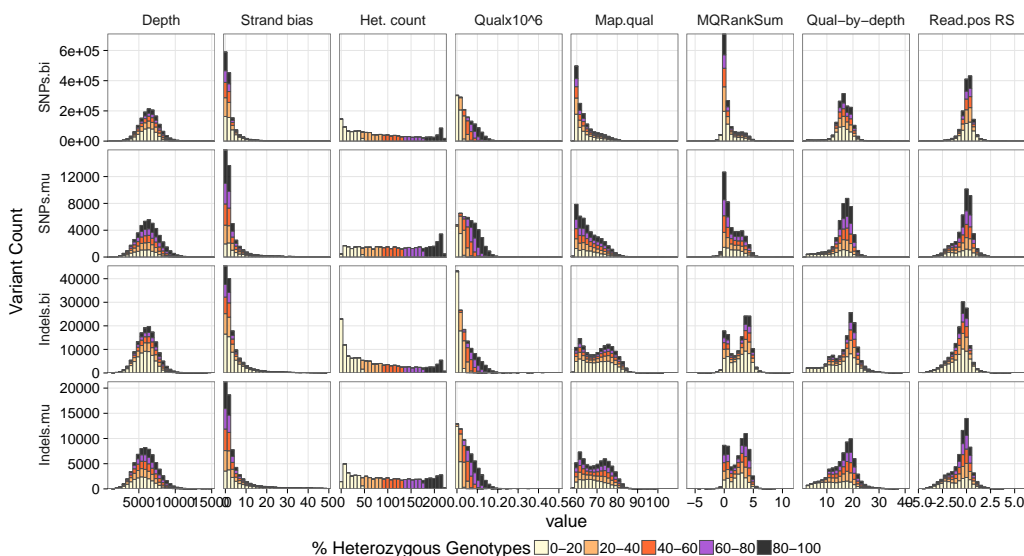

**Figure S1. Distribution of quality metrics for SNPs and indels, detected by Haplotype Caller.** Data generated by GATK VariantsToTable function and plotted in R. Plot bars are coloured by heterozygous genotype count, as a proxy for minor allele frequency in the hemiclone study sample. Code and data used to generate this figure are located at <https://doi.org/10.5281/zenodo.159282>.

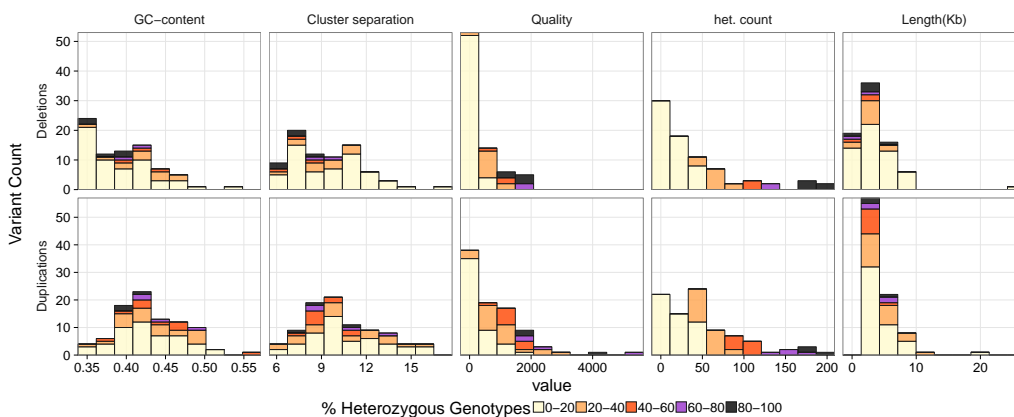

**Figure S2. Distribution of quality metrics for structural variants detected by Genomestrip.** Data generated by GATK VariantsToTable function and plotted in R. Plot bars are coloured by heterozygous genotype count, as a proxy for minor allele frequency in the hemiclone study sample. Data and code for this figure are located at <https://doi.org/10.5281/zenodo.159282>.



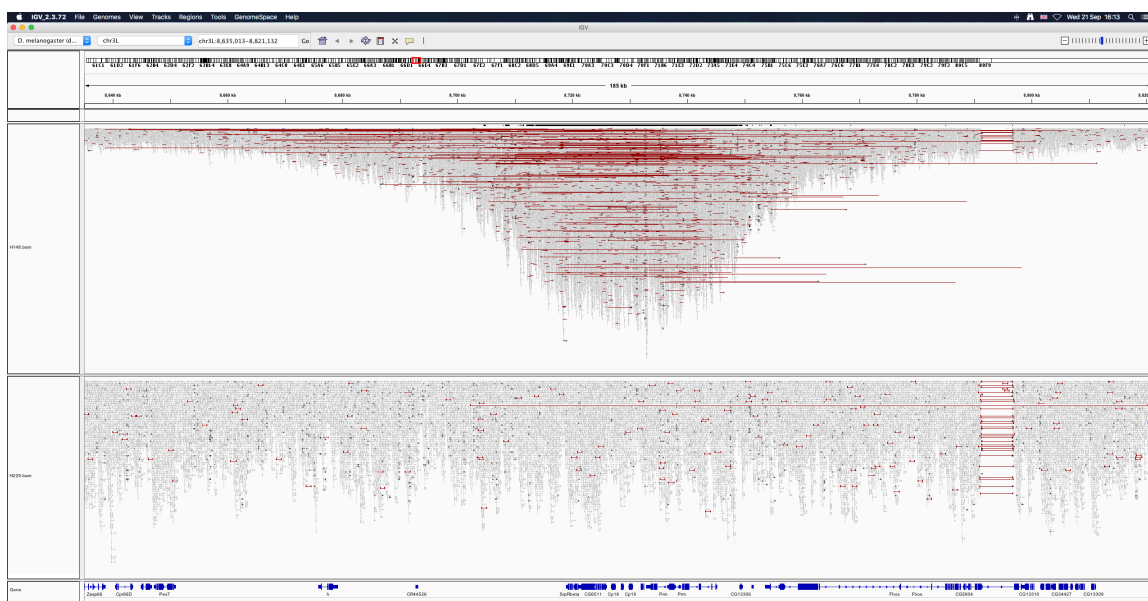

**Figure S3. *In vivo* amplification in next-generation sequencing data.** Image taken from visualisation of *bam* sequence alignment files using Integrated Genomics Viewer, and shows region around the chorion protein genes 18 and 19 on chromosome arm 3L. Small grey blocks indicate sequence reads. Horizontal red lines indicate read pairs which are >1000bp apart. The upper sample (H148) exhibits the amplification, whereas the lower sample (H001) does not. Also shown below in dark blue, are the positions of genes in the region.
